# Supplementary material for: BAM15 treatment mitigates lipopolysaccharide-induced acute lung injury by preserving mitochondrial dynamic equilibrium and modulating inflammatory responses via the cGAS–STING signalling pathway
Source: Research Square preprint supplement (doi:10.21203/rs.3.rs-7622689/v1), 2025-10-17
Supplement: Supplementary file 1 [file 5d00cb0adcba5ef7cb99175d.docx]

**Supplemental Figure 1.** Assessment of the potential effects of BAM15 on liver, kidney, cardiac, and pancreatic function in mice.


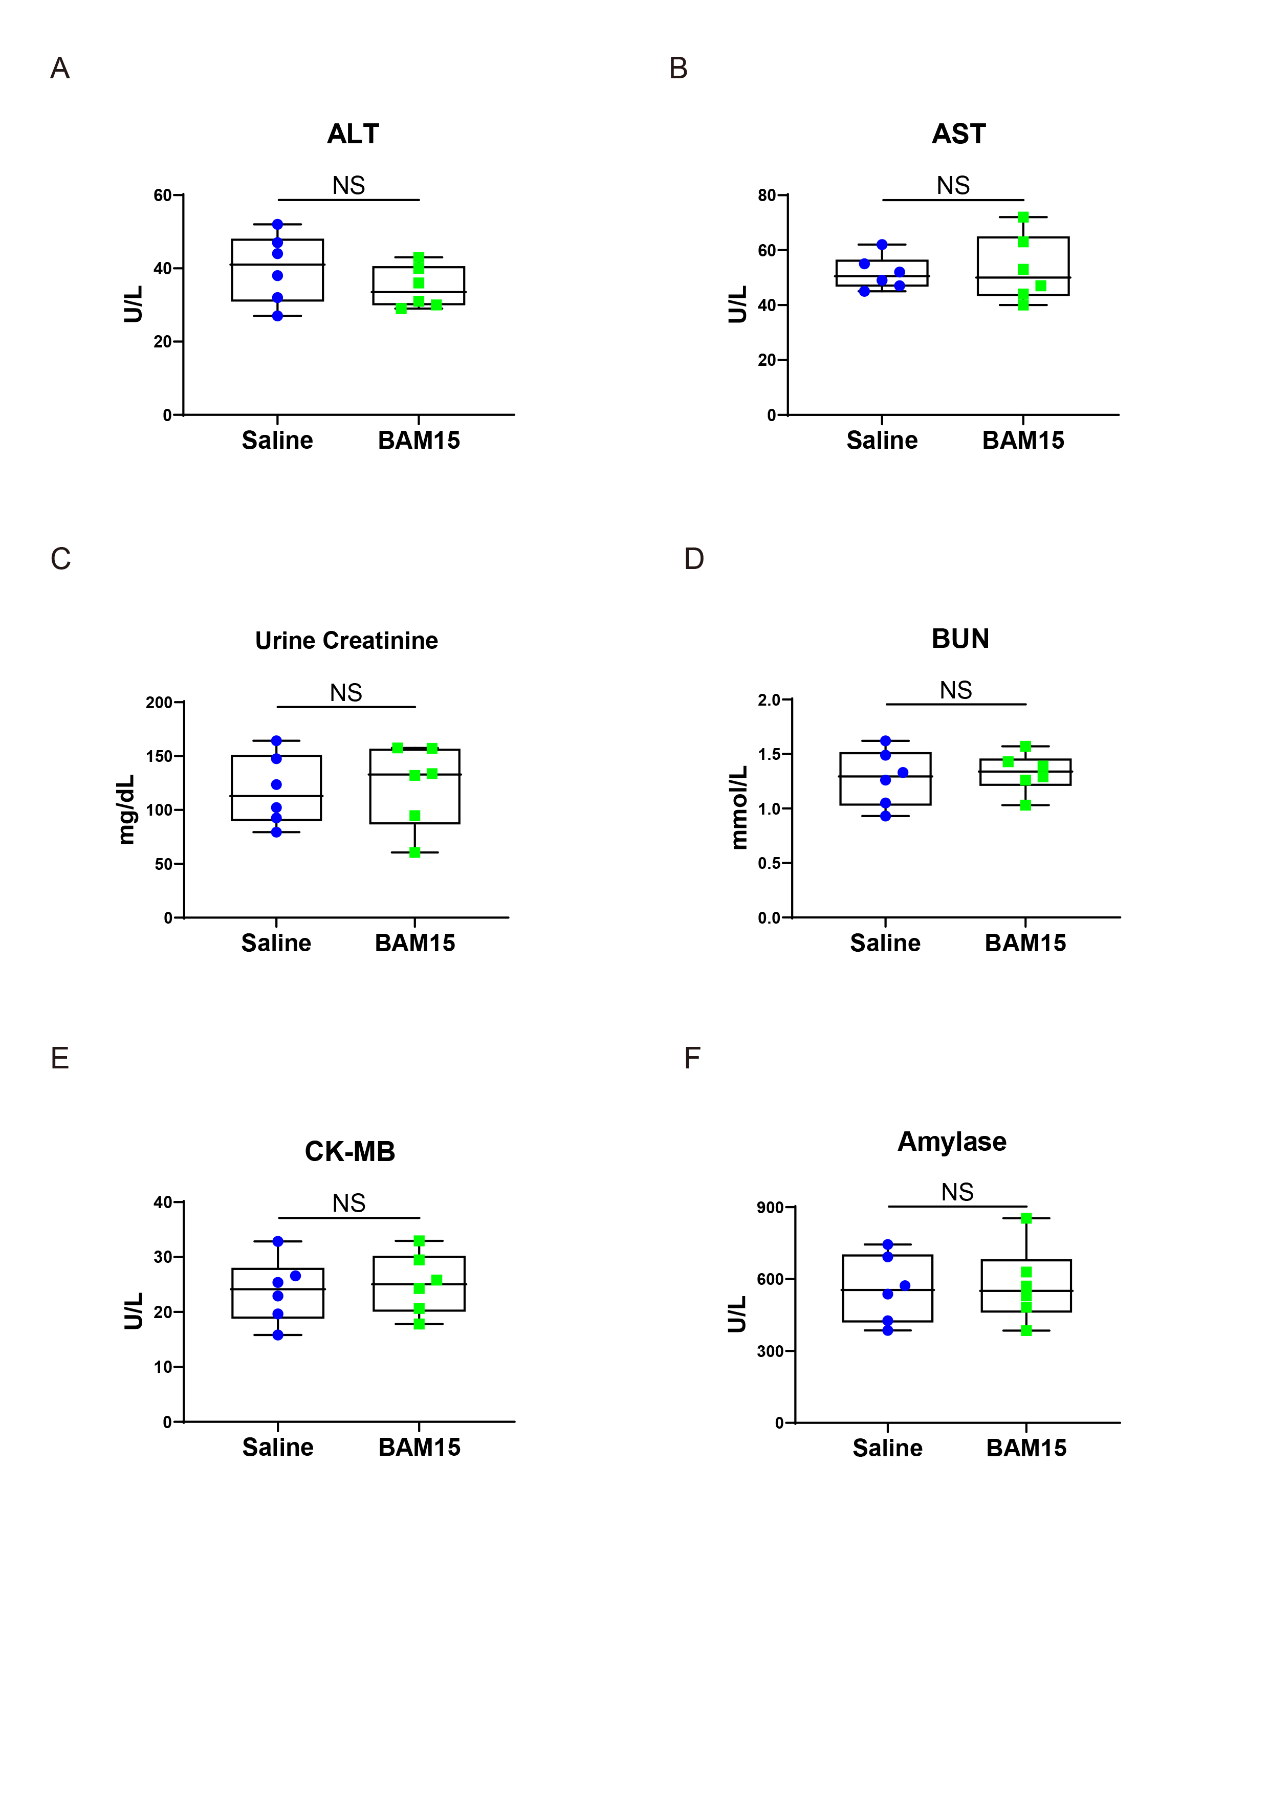


**Supplemental Figure 2.** Delayed BAM15 treatment improves lung injury outcomes and survival in LPS-induced ALI.


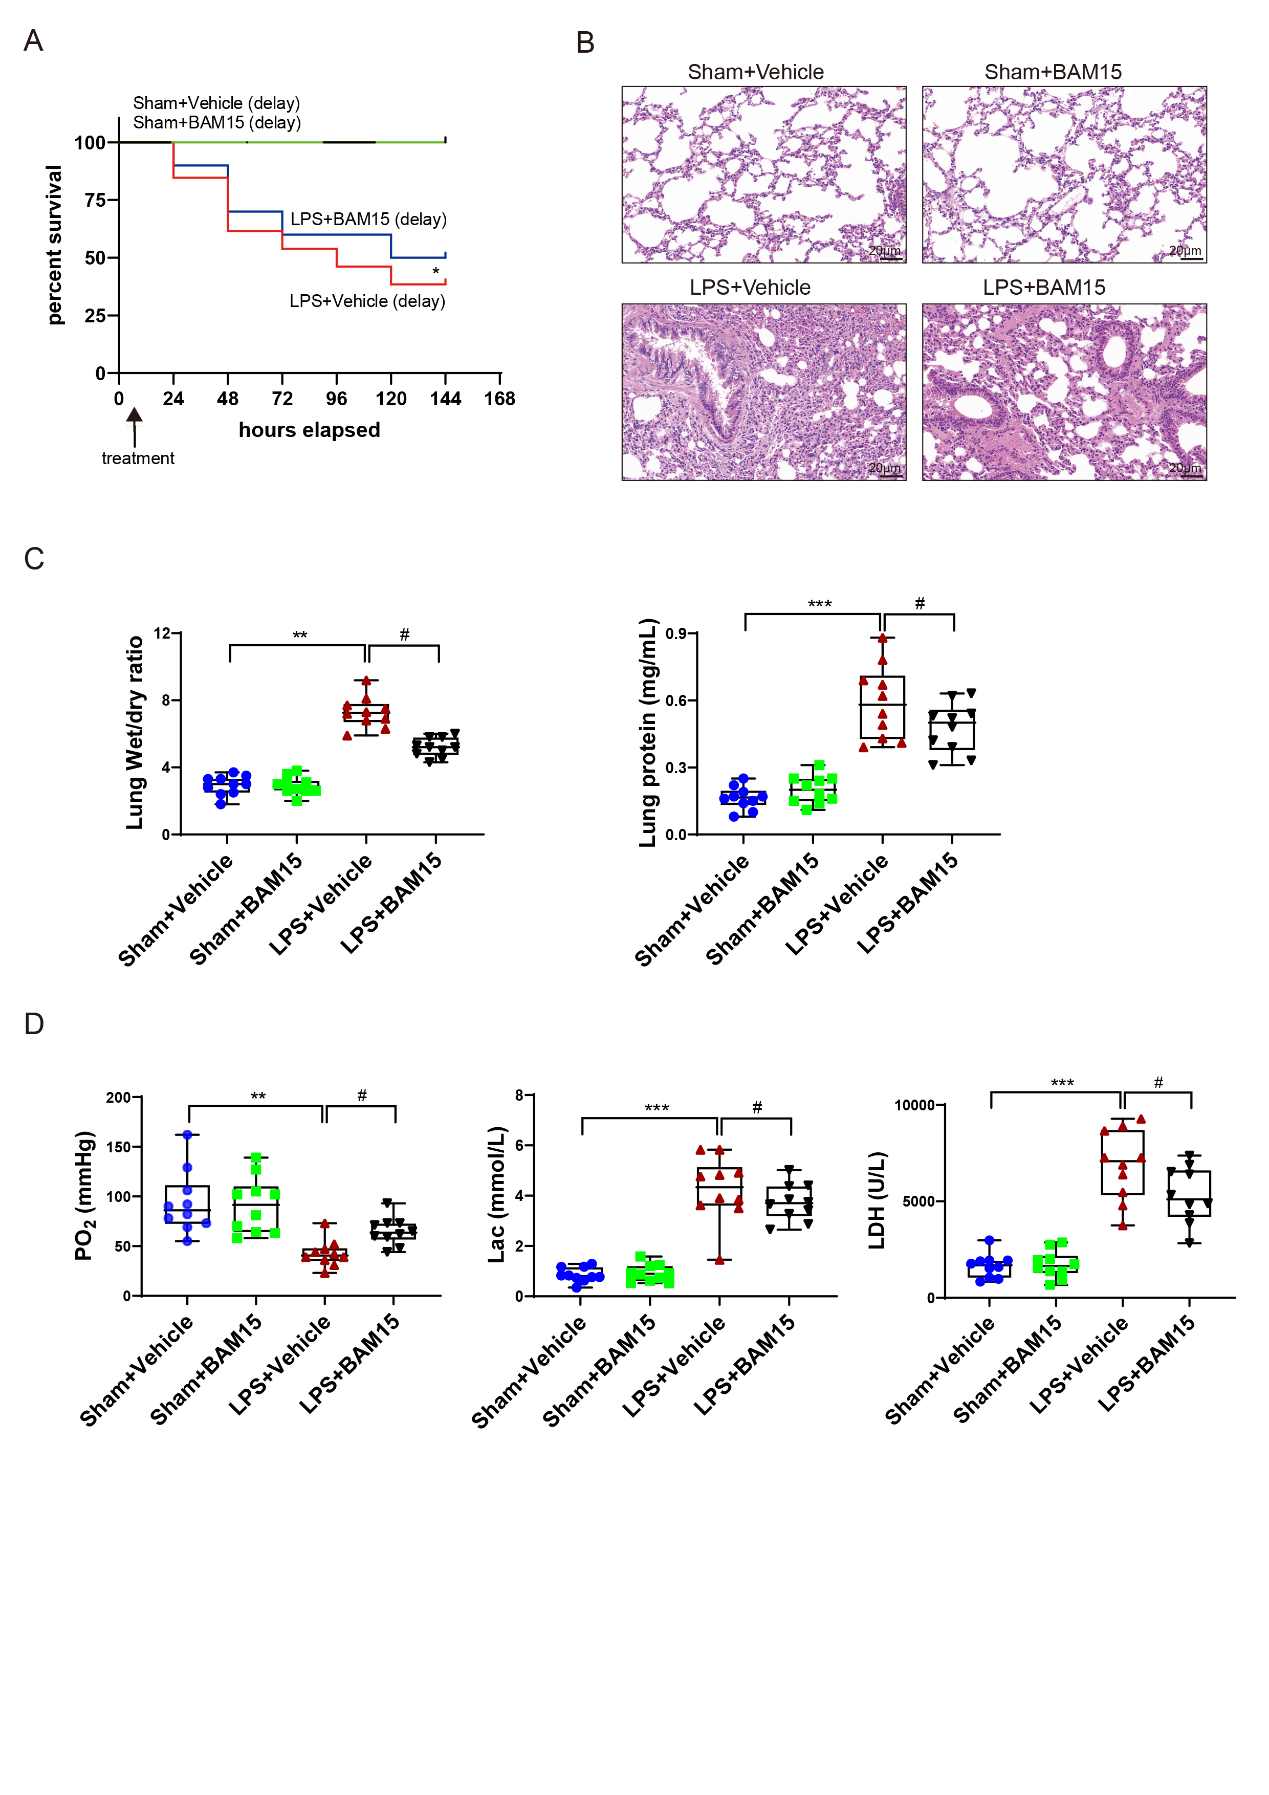


**Supplemental Figure 1.** Assessment of the potential effects of BAM15 on liver, kidney, cardiac, and pancreatic function in mice. Mice in each group were administered either saline (control) or BAM15 via subcutaneous injection, and samples were collected 24 hours post-injection for analysis. (A-B) Serum levels of liver function biomarkers, alanine aminotransferase (ALT) and aspartate aminotransferase (AST), showed no significant differences between the control and BAM15-treated groups. (C-D) Kidney function was evaluated by measuring serum creatinine, urine creatinine, and BUN levels, all of which remained within normal limits following BAM15 administration. (E) Cardiac function was assessed by measuring serum CKMB levels, and (F) pancreatic function was evaluated via amylase levels, with no significant changes observed. Data are presented as mean ± SD (*n* = 6). NS, no significance. Statistical significance was determined using a two-tailed Student’s t-test.

**Supplemental Figure 2.** Delayed BAM15 treatment improves lung injury outcomes and survival in LPS-induced ALI. (A) Kaplan-Meier survival curves of LPS-challenged mice treated with BAM15 (5 mg/kg, i.p.) 6 hours post-LPS administration compared to the vehicle group. BAM15-treated mice showed significantly improved 7-day survival rates. Group sizes: Sham+Vehicle/BAM15 (*n* = 6 each), LPS+Vehicle (*n* = 13), and LPS+BAM15 (*n* = 10). Survival rates were higher. **P* < 0.05, LPS+Vehicle vs.LPS+BAM15. (B) Representative H&E-stained lung tissue sections from the LPS+Vehicle and LPS+BAM15 groups, demonstrating reduced inflammation and edema in the BAM15-treated group. Scale bar = 20 μm. (C) Lung wet/dry ratio and BALF protein levels. (D) Arterial oxygenation, as indicated by partial pressure of arterial oxygen (PaO₂), Lac and LDH levels were significantly lower in the LPS+BAM15 group, indicating reduced lung tissue damage. Data show mean±SEM and *P*-value was calculated by One-way ANOVA, *n* = 10, ***P* < 0.01, ****P* < 0.001, LPS+Vehicle vs. Sham+Vehicle groups; #*P* < 0.05,LPS+Vehicle vs. LPS+BAM15.
